# Supplementary material for: The impact of high-risk and chronic opioid use among commercially insured endometriosis patients on health care resource utilization and costs in the United States
Source: PubMed Central journal article supplement — Womens Health (Lond). 2020 Dec 24;16:1745506520965898. doi: 10.1177/1745506520965898 (PMC7768844; doi:10.1177/1745506520965898), 2020-12-24
Supplement: sj-pdf-1-whe-10.1177_1745506520965898.pdf [file sj-pdf-1-whe-10.1177_1745506520965898.pdf]

Supplemental Table 1. Unadjusted HCRU for Endometriosis Patients with Opioid Use in the United States

| Characteristic                    | High-Risk vs. Low-Risk Opioid Users |                       |         | Chronic vs. Non-Chronic Opioid Users |                          |         |
|-----------------------------------|-------------------------------------|-----------------------|---------|--------------------------------------|--------------------------|---------|
|                                   | P-value                             | Low-risk Opioid Users | p-value | Chronic Opioid Users                 | Non-Chronic Opioid Users | p-value |
|                                   | Mean (SD)                           | Mean (SD)             |         | Mean (SD)                            | Mean (SD)                |         |
| <b>All-Cause HCRU</b>             |                                     |                       |         |                                      |                          |         |
| <b>Outpatient Visits</b>          | 19.74<br>(20.14)                    | 14.50<br>(15.04)      | <.0001  | 28.08<br>(24.09)                     | 15.00<br>(15.66)         | <.0001  |
| <b>ER Visits</b>                  | 0.75<br>(2.26)                      | 0.36<br>(0.98)        | <.0001  | 1.48<br>(3.59)                       | 0.39<br>(1.08)           | <.0001  |
| <b>Inpatient Visits</b>           | 0.15<br>(0.52)                      | 0.09<br>(0.35)        | <.0001  | 0.26<br>(0.77)                       | 0.10<br>(0.36)           | <.0001  |
| <b>Total LOS</b>                  | 0.70<br>(3.41)                      | 0.39<br>(2.35)        | <.0001  | 1.30<br>(5.14)                       | 0.41<br>(2.37)           | <.0001  |
| <b>Pharmacy Fills</b>             | 30.21<br>(29.53)                    | 16.88<br>(17.10)      | <.0001  | 54.93<br>(34.84)                     | 17.82<br>(18.07)         | <.0001  |
| <b>Endometriosis-Related HCRU</b> |                                     |                       |         |                                      |                          |         |
| <b>Outpatient Visits</b>          | 0.33<br>(1.35)                      | 0.26<br>(1.12)        | <.0001  | 0.52<br>(1.84)                       | 0.26<br>(1.12)           | <.0001  |
| <b>ER Visits</b>                  | 0.01<br>(0.18)                      | 0.01<br>(0.08)        | <.0001  | 0.03<br>(0.30)                       | 0.01<br>(0.08)           | <.0001  |
| <b>Inpatient Visits</b>           | 0.01<br>(0.11)                      | 0.01<br>(0.09)        | <.0001  | 0.02<br>(0.16)                       | 0.01<br>(0.09)           | <.0001  |
| <b>Total LOS</b>                  | 0.05<br>(0.58)                      | 0.02<br>(0.34)        | <.0001  | 0.08<br>(0.70)                       | 0.03<br>(0.39)           | <.0001  |
| <b>Pharmacy Fills</b>             | 0.15<br>(0.97)                      | 0.14<br>(0.95)        | 0.2605  | 0.16<br>(0.99)                       | 0.14<br>(0.95)           | 0.2297  |

Abbreviations: HCRU = health care resource utilization; ER = emergency room; LOS = length of stay; SD = standard deviation

Supplemental Table 2. Unadjusted Healthcare Costs for Endometriosis Patients with Opioid Use in the United States

| Characteristic                     | High-Risk vs. Low-Risk Opioid Users |                       |         | Chronic vs. Non-Chronic Opioid Users |                          |         |
|------------------------------------|-------------------------------------|-----------------------|---------|--------------------------------------|--------------------------|---------|
|                                    | High-risk Opioid Users              | Low-risk Opioid Users | p-value | Chronic Opioid Users                 | Non-Chronic Opioid Users | p-value |
|                                    | Mean (SD)                           | Mean (SD)             |         | Mean (SD)                            | Mean (SD)                |         |
| <b>All-Cause Costs</b>             |                                     |                       |         |                                      |                          |         |
| <b>Total costs</b>                 | \$14,510<br>(\$27,931)              | \$8,733<br>(\$20,216) | <.0001  | \$26,020<br>(\$24,408)               | \$9,071<br>(\$19,740)    | <.0001  |
| <b>Outpatient costs</b>            | \$7,921<br>(\$14,876)               | \$5,070<br>(\$13,947) | <.0001  | \$13,122<br>(\$21,930)               | \$5,279<br>(\$13,209)    | <.0001  |
| <b>ER costs</b>                    | \$841<br>(\$3,236)                  | \$396<br>(\$1,626)    | <.0001  | \$1,661<br>(\$5,199)                 | \$428<br>(\$1,714)       | <.0001  |
| <b>Inpatient costs</b>             | \$2,817<br>(\$13,638)               | \$1,596<br>(\$8,416)  | <.0001  | \$5,476<br>(\$21,049)                | \$1,647<br>(\$8,617)     | <.0001  |
| <b>Pharmacy costs</b>              | \$2,932<br>(\$11,376)               | \$1,673<br>(\$7,660)  | <.0001  | \$5,761<br>(\$17,304)                | \$1,718<br>(\$7,697)     | <.0001  |
| <b>Endometriosis-Related Costs</b> |                                     |                       |         |                                      |                          |         |
| <b>Total costs</b>                 | \$817<br>(\$4,555)                  | \$583<br>(\$3,706)    | <.0001  | \$1,259<br>(\$5,584)                 | \$599<br>(\$3,800)       | <.0001  |
| <b>Outpatient costs</b>            | \$523<br>(\$3,338)                  | \$410<br>(\$2,958)    | <.0001  | \$745<br>(\$3,469)                   | \$416<br>(\$3,038)       | <.0001  |
| <b>ER costs</b>                    | \$15<br>(\$276)                     | \$7<br>(\$197)        | 0.0009  | \$36<br>(\$464)                      | \$7<br>(\$188)           | <.0001  |
| <b>Inpatient costs</b>             | \$233<br>(\$2,748)                  | \$126<br>(\$1,967)    | <.0001  | \$416<br>(\$3,730)                   | \$134<br>(\$2,041)       | <.0001  |
| <b>Pharmacy costs</b>              | \$47<br>(\$492)                     | \$41<br>(\$442)       | 0.1524  | \$61<br>(\$559)                      | \$41<br>(\$447)          | 0.0150  |

Abbreviations: ER = emergency room; SD = standard deviation
